# Supplementary material for: A lead-free layered Dion–Jacobson hybrid double perovskite constructed by an aromatic diammonium cation
Source: Royal Society of Chemistry journal article supplement (doi:10.1039/d1qi00219h), 2021-01-01
Supplement: d1qi00219h2.pdf [file d1qi00219h2.pdf]

## Electronic Supplementary Information (ESI)

# Lead-free Layered Dion-Jacobson Hybrid Double Perovskite Constructed by Aromatic Diammonium Cation

Dongying Fu<sup>\*a</sup>, Shichao Wu<sup>a</sup>, Yanyun Liu<sup>b</sup>, Yunpeng Yao<sup>c</sup>, Yueyue He<sup>a</sup>, Xian-Ming Zhang<sup>\*a</sup>

*a* Institute of Crystalline Materials, Institute of Molecular Science, Shanxi University, Taiyuan, Shanxi 030006, China,

*b* Department of Chemistry and Chemical Engineering, Jinzhong University, Jinzhong 030619, China

*c* State Key Laboratory of Structural Chemistry, Fujian Institute of Research on the Structure of Matter, Chinese Academy of Sciences, Fuzhou, Fujian, 350002, P. R. China.

\*E-mail: dyfu@sxu.edu.cn (D. Fu), xmzhang@sxu.edu.cn (X.-M. Zhang)

## Table of Content

|                                                                       |   |
|-----------------------------------------------------------------------|---|
| <b>Experimental Section</b> .....                                     | 2 |
| Materials and Synthesis.....                                          | 2 |
| <b>Measurements</b> .....                                             | 2 |
| Powder X-Ray Diffraction Analysis and Thermogravimetric Analysis..... | 2 |
| SCXRD Structure Determination.....                                    | 2 |
| Ultraviolet-visible (UV-vis) Absorption Spectrum.....                 | 2 |
| <b>Computational Details</b> .....                                    | 2 |
| PXRD Spectra and Stability Test, TGA Test and Infrared spectrum.....  | 3 |
| The 2D fingerprint plot of H <sub>2</sub> O molecule.....             | 4 |
| The electronic energy band structure of <b>1</b> .....                | 4 |
| Crystal stability test of <b>1</b> .....                              | 5 |
| The I-V curves of <b>1</b> .....                                      | 5 |
| Crystal Data and Structure Refinement for <b>1</b> .....              | 6 |

Selected bond lengths (Å) for **1**.....6

Selected bond angles (°) for **1**.....7

## Experimental section

### Materials and Synthesis

All chemicals were purchased by Aladdin except as otherwise illustrated. For the preparation of [(3AMPY)<sub>2</sub>AgBiI<sub>8</sub>·H<sub>2</sub>O] (3AMPY=3-(aminomethyl) pyridinium) (**1**), a reaction mixture contains stoichiometric 3AMPY (0.43 g, 4 mmol), Ag<sub>2</sub>O (0.23 g, 1 mmol) and Bi<sub>2</sub>O<sub>3</sub> (0.26 g, 1 mmol) in 20 mL HI (47%) solution was heated and stirred for a few minutes to get the clear solution, after that the clarified liquid was slowly cooled to room temperature. The red rectangular crystals of (3AMPY)<sub>2</sub>AgBiI<sub>8</sub>·H<sub>2</sub>O have been obtained by slow evaporation after several days.

### Measurements

#### Powder X-Ray Diffraction Analysis and Thermogravimetric Analysis

MiniFlex 600 Powder X-Ray Diffractometer (PXRD) was used to check the phase purity of desired compounds. The experimental PXRD patterns were recorded in the 2 theta (2θ) range of 5°-50° with a step size of 3°/ min. The experimental PXRD patterns obtained at room temperature match well with the calculated data based on the single-crystal structure, which solidly confirm the purity of the as-grown crystals of (3AMPY)<sub>2</sub>AgBiI<sub>8</sub>·H<sub>2</sub>O. Thermogravimetric (TG) measurement was implemented on a Netzsch STA 449C thermal analyser with an N<sub>2</sub> flow rate of 30 mL min<sup>-1</sup> and a heating rate of 10 K min<sup>-1</sup> from 300 K to 1000 K.

#### SCXRD Structure Determination

Single crystal X-ray diffraction (SCXRD) was performed on Bruker D8 diffractometer by using Mo Kα radiation (λ=0.71073 Å). Intensity data acquisition, data reduction and cell refinement were performed using the “multi-scan” program. The structures of all desired compounds were solved by direct methods and refinements were made by the least-squares program. Table S1 summarizes the detailed information of crystal parameters, structure refinement and data collection. The selected bond lengths and angles are shown in Table S2-S3.

#### Ultraviolet-visible (UV-vis) Absorption Spectrum

UV-vis diffuse reflectance spectroscopy of (3AMPY)<sub>2</sub>AgBiI<sub>8</sub>·H<sub>2</sub>O was performed at room temperature on Perkin-Elmer Lambda 900 UV-Vis spectrophotometer in a variable wavelength range between 200 to 1000nm. The BaSO<sub>4</sub> was used as the 100% reflectance reference, and the powdered crystals were used for the measurements.

Near the cut-off of the optical transmission, the band gap, the absorption value and the wave frequency obey the equation:  $(hv \cdot F(R_{\infty}))^{1/n} = A (hv - E_g)$  where h, v, F(R<sub>∞</sub>), A, and E<sub>g</sub> are the Planck's constant, the frequency of vibration, the Kubelka-Munk equation, the proportional constant and the band gap, respectively. In the equation, n decides the characteristics of the transition in a semiconductor (n=1/2, direct absorption; n=2, indirect absorption). The values of n and E<sub>g</sub> were determined by the following steps: first, plot ln(ahv) vs ln(hv - E<sub>g</sub>) using the approximate E<sub>g</sub> value, and then determine the value of n with the slope of the straight line near the band edge; second, plot (ahv)<sup>1/n</sup> vs hv and then obtain the band gap E<sub>g</sub> by extrapolating the straight line to the hv axis intercept.

## Computational Details

First-principles density function theory (DFT) calculations were performed with the Cambridge Sequential Total Energy Package (CASTEP). The exchange-correlation functional was described by a generalized gradient approximation (GGA) with Perdew-Burke-Ernzerhof functional for solids (PBEsol) scheme. The interactions between the ionic cores and the electrons were described by the norm-conserving pseudopotential.<sup>4</sup> The following orbital electrons were treated as valence electrons: Bi 6s<sup>2</sup> 6p<sup>3</sup>; Ag 4d<sup>10</sup> 5s<sup>2</sup> 5p<sup>3</sup>; I 5s<sup>2</sup> 5p<sup>5</sup>; C 2s<sup>2</sup> 2p<sup>2</sup>; N 2s<sup>2</sup>2p<sup>3</sup> and H 1s<sup>1</sup>. The numbers of plane waves included in the basis sets were determined by a cutoff energy 765 eV. To achieve the accurate density of the electronic states, the *k*-space integrations were done with Monkhorst-Pack grids with a 6 × 6 × 3 *k*-point for compound **1**. The other parameters and convergent criteria were the default values of CASTEP code.

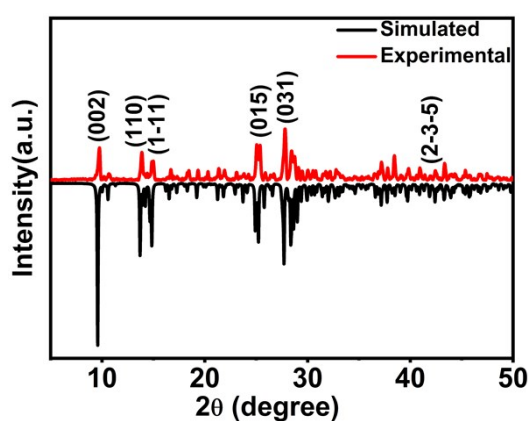

SFig.1 Experimental and simulated powder x-ray diffractions patterns (PXRD) spectra of **1**.

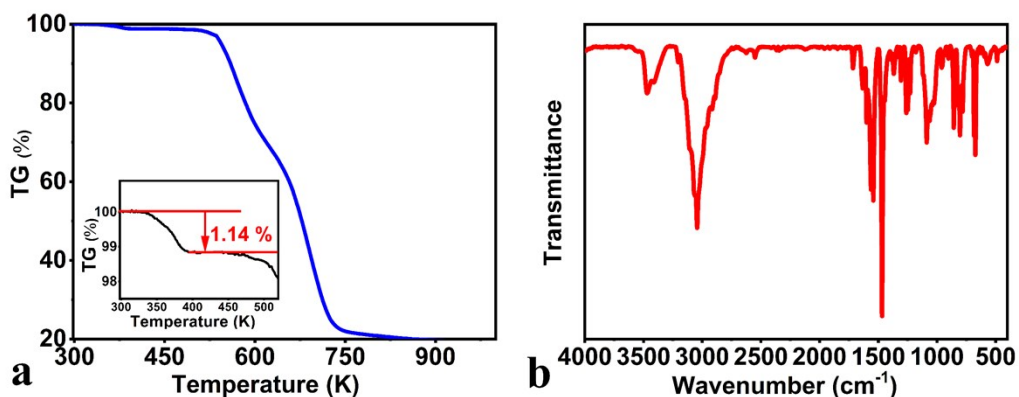

SFig.2 (a) The TGA of the compound **1**, (b) Infrared spectrum of **1** obtained at room temperature.

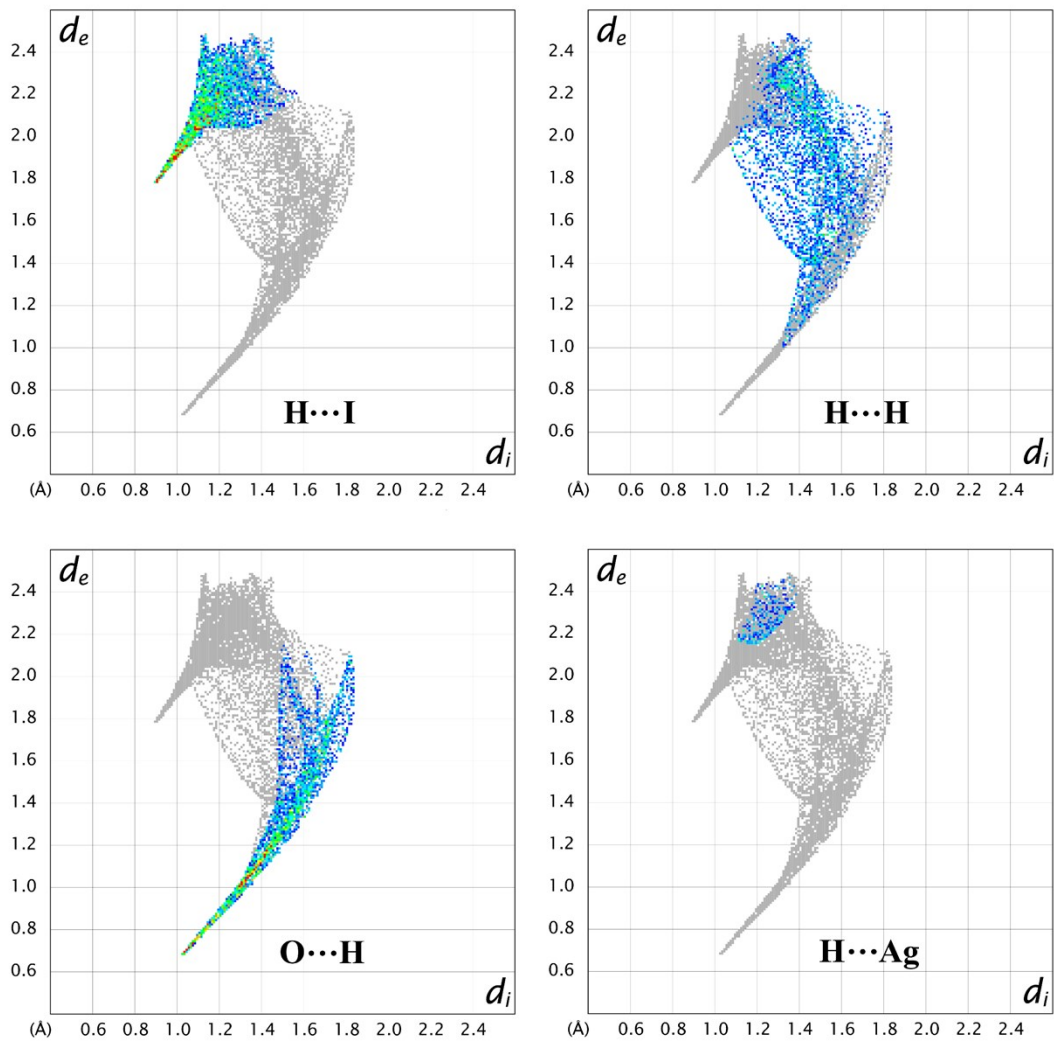

SFig.3 The 2D fingerprint plot of H<sub>2</sub>O molecule.

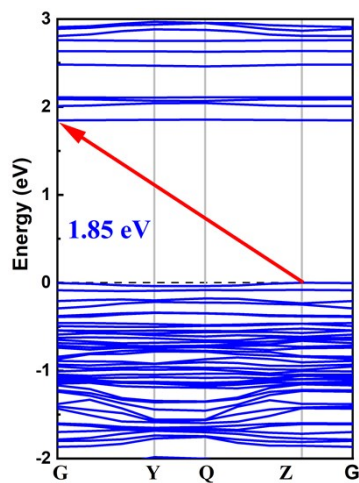

SFig.4 The electronic energy band structure of 1.

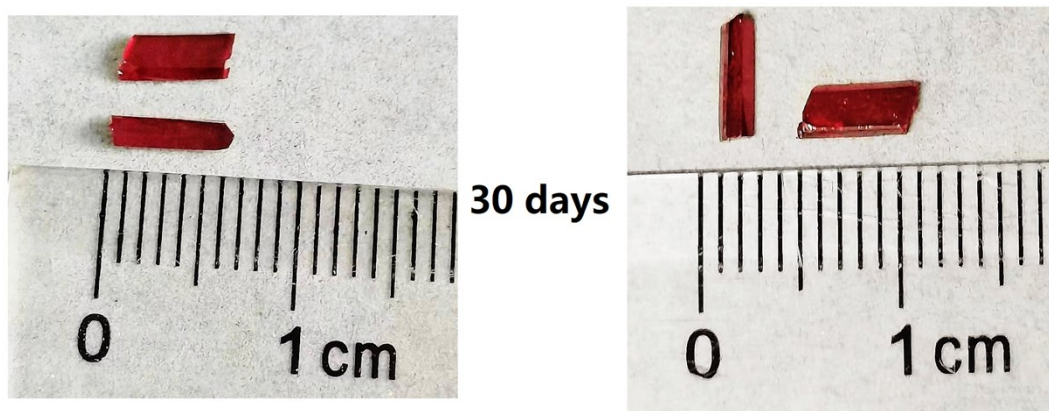

SFig.5 Crystal stability test of 1.

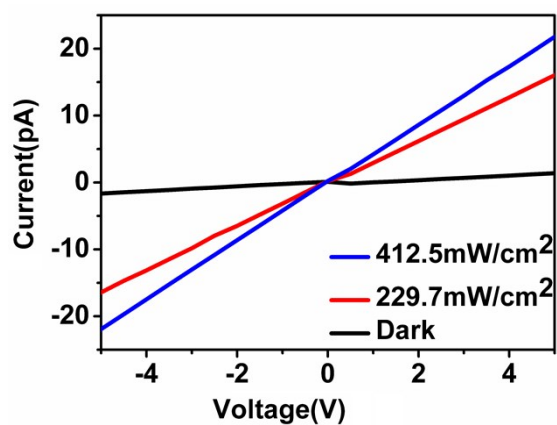

SFig.6 The I-V curves of 1 under the 637 nm light illumination.

Table S1. Crystal Data and Structure Refinement for  $(3\text{AMPY})_2\text{AgBiI}_8 \cdot \text{H}_2\text{O}$ .

|                 |  |                                                           |
|-----------------|--|-----------------------------------------------------------|
| Formula         |  | $(3\text{AMPY})_2\text{AgBiI}_8 \cdot \text{H}_2\text{O}$ |
| Formula weight  |  | 1570.38                                                   |
| (g/mol)         |  |                                                           |
| Temperature (K) |  | 200.02 K                                                  |
| Crystal system  |  | triclinic                                                 |
| Space group     |  | P-1                                                       |
| $a$ (Å)         |  | 8.5258(4)                                                 |
| $b$ (Å)         |  | 9.7136(5)                                                 |
| $c$ (Å)         |  | 18.5101(10)                                               |
| $\alpha$ (deg)  |  | 86.146(2)                                                 |

|                                         |                                                              |
|-----------------------------------------|--------------------------------------------------------------|
| $\beta$ (deg)                           | 88.192(2)                                                    |
| $\gamma$ (deg)                          | 88.857(2)                                                    |
| Volume (Å <sup>3</sup> )                | 1528.46(13)                                                  |
| Z                                       | 2                                                            |
| $D_{\text{calcd}}$ (g/cm <sup>3</sup> ) | 3.412                                                        |
| $F(000)$                                | 1368.0                                                       |
| limiting indices                        | $-11 \leq h \leq 11, -12 \leq k \leq 12, -24 \leq l \leq 24$ |
| reflns collected                        | 55189                                                        |
| <b>completeness (%)</b>                 | 99.8                                                         |
| data / restraints / param               | 7023/0/249                                                   |
| final R indices                         | $R_1 = 0.0302, wR_2 = 0.0644$                                |
| [ $I > 2\sigma(I)$ ]                    |                                                              |
| R indices (all data)                    | $R_1 = 0.0367, wR_2 = 0.0675$                                |

**Table S2.** Selected bond lengths (Å) for **(3AMPY)<sub>2</sub>AgBiI<sub>8</sub>·H<sub>2</sub>O** .

| Bond   | (Å)       | Bond                | (Å)       |
|--------|-----------|---------------------|-----------|
| Bi1–I8 | 3.0652(4) | I8–Ag1 <sup>1</sup> | 3.7719(9) |
| Bi1–I6 | 2.9722(4) | I1–Ag1              | 2.6995(8) |
| Bi1–I7 | 3.1183(5) | I5–Ag12             | 3.2672(9) |
| Bi1–I5 | 3.0839(4) | I2–Ag1              | 2.6923(7) |
| Bi1–I4 | 3.0456(5) | I3–Ag1              | 3.0470(8) |

<sup>1</sup><sub>1-X,+Y,+Z</sub>; <sup>2</sup><sub>2+X,1+Y,+Z</sub>; <sup>3</sup><sub>1-X,1-Y,-1/2+Z</sub>; <sup>4</sup><sub>1-X,1-Y,1/2+Z</sub>; <sup>5</sup><sub>5+X,2-Y,1/2+Z</sub>; <sup>6</sup><sub>6+X,1-Y,1/2+Z</sub>; <sup>7</sup><sub>7+X,2-Y,-1/2+Z</sub>; <sup>8</sup><sub>8+X,1-Y,-1/2+Z</sub>; <sup>9</sup><sub>9+X,-1+Y,+Z</sub>; <sup>10</sup><sub>1-X,-Y,-1/2+Z</sub>; <sup>11</sup><sub>1-X,-Y,1/2+Z</sub>

**Table S3.** Selected bond angles (°) for **(3AMPY)<sub>2</sub>AgBiI<sub>8</sub>·H<sub>2</sub>O**.

| Bond      | (°)         | Bond        | (°)         |
|-----------|-------------|-------------|-------------|
| I8–Bi1–I7 | 87.595(13)  | I1–Ag1–I63  | 73.556(19)  |
| I8–Bi1–I5 | 177.948(14) | I2–Ag1–I63  | 80.298(19)  |
| I6–Bi1–I8 | 90.958(12)  | I2–Ag1–I1   | 152.85(3)   |
| I6–Bi1–I7 | 89.557(12)  | I3–Ag1–I63  | 171.75(2)   |
| I7–Bi1–I3 | 92.661(13)  | Ag1–I3–Bi1  | 155.34(2)   |
| I5–Bi1–I7 | 90.761(13)  | Bi1–I8–Ag11 | 161.980(18) |
| I4–Bi1–I8 | 91.007(13)  | Bi1–I5–Ag12 | 169.68(2)   |

<sup>1</sup><sub>1+X,1-Y,1-Z</sub>; <sup>2</sup><sub>2+X,1/2-Y,1/2+Z</sub>; <sup>3</sup><sub>3+X,1/2+Y,1/2-Z</sub>; <sup>4</sup><sub>1-X,-Y,1-Z</sub>; <sup>5</sup><sub>1-X,+Y,+Z</sub>; <sup>6</sup><sub>6+X,-Y,1-Z</sub>; <sup>7</sup><sub>1-X,1/2-Y,1/2+Z</sub>; <sup>8</sup><sub>8+X,-1+Y,+Z</sub>; <sup>9</sup><sub>1-X,1/2-Y,-1/2+Z</sub>; <sup>10</sup><sub>10+X,1-Y,-Z</sub>
